# Supplementary material
Source: PubMed Central journal article supplement (PMC3307194)
Supplement: supp_peds.2011-0351_zpe611117729p.pdf [file supp_peds.2011-0351_zpe611117729p.pdf]

# Supplemental Information

**SUPPLEMENTAL TABLE 5** Summary of ADG Morbidity Clusters

|                           | No Anesthesia<br>( <i>n</i> = 700), <i>n</i> (%) | Anesthesia<br>( <i>n</i> = 350), <i>n</i> (%) | <i>P</i> |
|---------------------------|--------------------------------------------------|-----------------------------------------------|----------|
| Time limited              |                                                  |                                               |          |
| Minor                     | 346 (49)                                         | 207 (59)                                      | .003     |
| Minor primary infections  | 614 (88)                                         | 309 (88)                                      | .789     |
| Major                     | 88 (13)                                          | 106 (30)                                      | <.001    |
| Major primary infections  | 134 (19)                                         | 100 (29)                                      | <.001    |
| Allergies                 | 60 (9)                                           | 43 (12)                                       | .056     |
| Asthma                    | 74 (11)                                          | 30 (9)                                        | .307     |
| Likely to recur           |                                                  |                                               |          |
| Discrete                  | 70 (10)                                          | 54 (15)                                       | .010     |
| Infections                | 578 (83)                                         | 311 (89)                                      | .008     |
| Progressive               | 1 (0)                                            | 1 (0)                                         | .617     |
| Chronic medical           |                                                  |                                               |          |
| Stable                    | 70 (10)                                          | 65 (19)                                       | <.001    |
| Unstable                  | 81 (12)                                          | 60 (17)                                       | .013     |
| Chronic specialty         |                                                  |                                               |          |
| Stable                    |                                                  |                                               |          |
| Orthopedic                | 16 (2)                                           | 16 (5)                                        | .042     |
| Ear, nose, throat         | 10 (1)                                           | 10 (3)                                        | .110     |
| Eye                       | 196 (28)                                         | 113 (32)                                      | .151     |
| Unstable                  |                                                  |                                               |          |
| Orthopedic                | 0 (0)                                            | 0 (0)                                         | —        |
| Ear, nose, throat         | 0 (0)                                            | 0 (0)                                         | —        |
| Eye                       | 18 (3)                                           | 38 (11)                                       | <.001    |
| Dermatologic              | 122 (17)                                         | 74 (21)                                       | .145     |
| Injuries/adverse effects  |                                                  |                                               |          |
| Minor                     | 308 (44)                                         | 175 (50)                                      | .066     |
| Major                     | 192 (27)                                         | 124 (35)                                      | .008     |
| Psychosocial              |                                                  |                                               |          |
| Time limited: minor       | 21 (3)                                           | 21 (6)                                        | .019     |
| Recurrent or persistent   |                                                  |                                               |          |
| Stable                    | 50 (7)                                           | 51 (15)                                       | <.001    |
| Unstable                  | 1 (0)                                            | 0 (0)                                         | .479     |
| Signs/symptoms            |                                                  |                                               |          |
| Minor                     | 245 (35)                                         | 147 (42)                                      | .027     |
| Uncertain                 | 137 (20)                                         | 91 (26)                                       | .017     |
| Major                     | 193 (28)                                         | 128 (37)                                      | .003     |
| Discretionary             | 431 (62)                                         | 277 (79)                                      | <.001    |
| See and reassure          | 16 (2)                                           | 29 (8)                                        | <.001    |
| Prevention/administrative | 696 (99)                                         | 350 (100)                                     | .157     |
| Malignancy                | 4 (1)                                            | 1 (0)                                         | .526     |
| Pregnancy                 | 0 (0)                                            | 0 (0)                                         | —        |
| Dental                    | 29 (4)                                           | 17 (5)                                        | .594     |
